# Supplementary material
Source: PubMed Central journal article supplement (PMC3712973)
Supplement: NIHMS2798-supplement-FigureS1-S3-TableS1-S2.pdf [file NIHMS2798-supplement-FigureS1-S3-TableS1-S2.pdf]

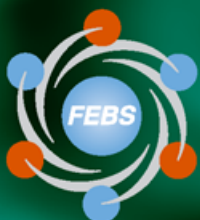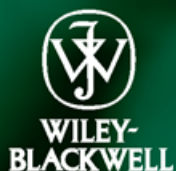

## **Structural determination of the phosphorylation domain of the ryanodine receptor**

Parveen Sharma, Noboru Ishiyama, Usha Nair, Wenping Li, Aiping Dong, Tetsuaki Miyake, Aaron Wilson, Tim Ryan, David H. MacLennan, Thomas Kislinger, Mitsuhiro Ikura, Sirano Dhe-Paganon and Anthony O. Gramolini

DOI: 10.1111/j.1742-4658.2012.08755.x

## Supplemental Figure 1: C3 construct sequence analysis

|                                                   |      |                                                       |      |
|---------------------------------------------------|------|-------------------------------------------------------|------|
| sp P21817 RYR1_HUMAN                              | 2733 | GNFDRPVETLNVIIPEKLSDF INKFAEYTHE KWAFDKIQNNWSY GENID  | 2782 |
| tr Q29105 Q29105_PIG                              | 2734 | GNFDRPVETLNVIIPEKLSDF INKFAEYTHE KWAFDKIQNNWSY GENID  | 2783 |
| sp P11716 RYR1_RABIT                              | 2733 | GNFDRPVETLNVIIPEKLSDF INKFAEYTHE KWAFDKIQNNWSY GENID  | 2782 |
| tr Q80X16 Q80X16_MOUSE                            | 2734 | GNFDRPVETLNVIIPEKLSDF INKFAEYTHE KWAFDKIQNNWSY GENID  | 2783 |
| tr B4XW97 B4XW97_MELGA                            | 2720 | GNFDPKPVETLNVIIPEKLDGF INKYAEFTHE KWAFDKIQNNWTY GETVD | 2769 |
| tr O13054 O13054_MAKNI                            | 2772 | GNFDPKPVETLNTIIIPERLDPF INRFAEYTHDKWAFDKIQNNWSY GEVLD | 2821 |
| tr A6P4B8 A6P4B8_DANRE                            | 2755 | GNFDPKPVETLNTIIIPERLDAF INKYAEHTHDKWAFDKIQNNWTY GEVLD | 2804 |
| *****:**** *.:****:* ****:;*.**:****:*****:*** :* |      |                                                       |      |
| sp P21817 RYR1_HUMAN                              | 2783 | EELKTHPMLR PYKTFSEKDKEI YRWPIKESLKAMIAWEWTIEKAREGEEE  | 2832 |
| tr Q29105 Q29105_PIG                              | 2784 | EELKTHPMLR PYKTFSEKDKEI YRWPIKESLKAMIAWEWTIEKAREGEEE  | 2834 |
| sp P11716 RYR1_RABIT                              | 2783 | EELKTHPMLR PYKTFSEKDKEI YRWPIKESLKAMIAWEWTIEKAREGEEE  | 2832 |
| tr Q80X16 Q80X16_MOUSE                            | 2784 | EELKTHPMLR PYKTFSEKDKEI YRWPIKESLKAMIAWEWTIEKAREGEEE  | 2834 |
| tr B4XW97 B4XW97_MELGA                            | 2770 | EELKTHPMLR PYKTFSEKDKEI YRWPIKESLKAMIAWEWTIEKAREGEEE  | 2819 |
| tr O13054 O13054_MAKNI                            | 2822 | ENAKTHPMLR PYKTFSEKDKEI YRWPIKESLKAMIAWEWTIEKAREGEEE  | 2870 |
| tr A6P4B8 A6P4B8_DANRE                            | 2805 | ENAKTHPMLR PYKTFSEKDKEI YRWPIKESLKAMIAWEWTIEKAREGEEE  | 2854 |
| *: *****:*****:****:**** :****: ; *               |      |                                                       |      |
| sp P21817 RYR1_HUMAN                              | 2833 | -KTEKKKTRK ISQSAQ-TYDREGYNPQPPDL SAVTLSRELQAMAEQLAE   | 2880 |
| tr Q29105 Q29105_PIG                              | 2835 | -KTEKKKTRK ISQSAQ-TYDAREGYNPQPPDL SGVTLRELQAMAEQLAE   | 2881 |
| sp P11716 RYR1_RABIT                              | 2833 | -RTEKKKTRK ISQTAQ-TYDREGYNPQPPDL SGVTLRELQAMAEQLAE    | 2880 |
| tr Q80X16 Q80X16_MOUSE                            | 2835 | -KTEKKKTRK ISQTAQ-TYDREGYNPQPPDL SVVTLRELQAMAEQLAE    | 2881 |
| tr B4XW97 B4XW97_MELGA                            | 2820 | -KAEKKKTRK ISQSAQATYDPS HGYNPQPPDL SGVTLRELQAMAEQLAE  | 2868 |
| tr O13054 O13054_MAKNI                            | 2871 | SEKKKATSRK ISQTAQATYDPS HGYSPPQIDI SHVALSRDLQSMAEQLAE | 2920 |
| tr A6P4B8 A6P4B8_DANRE                            | 2855 | VKTEVKATRK ISQTAQATYDPS QGYSPPQVDL IGMALSRDLQSMAEQLAE | 2904 |
| . : :*****:****. .**.* ** : :****:*****           |      |                                                       |      |
| sp P21817 RYR1_HUMAN                              | 2881 | NYHNTWGRKKKQLEAKGGGTH PLLVPYDTLT AKEKARDREKAQE LLKFL  | 2930 |
| tr Q29105 Q29105_PIG                              | 2882 | NYHNTWGRKKKQLEAKGGGTH PLLVPYDTLT AKEKARDREKAQE LLKFL  | 2931 |
| sp P11716 RYR1_RABIT                              | 2881 | NYHNTWGRKKKQLEAKGGGTH PLLVPYDTLT AKEKARDREKAQE LLKFL  | 2930 |
| tr Q80X16 Q80X16_MOUSE                            | 2882 | NYHNTWGRKKKQLEAKGGGSH PLLVPYDTLT AKEKARDREKAQE LLKFL  | 2931 |
| tr B4XW97 B4XW97_MELGA                            | 2869 | NYHNTWGRKKKQLEAKGGGSH PLLVPYDTLT AKEKARDREKAQE LLKFL  | 2918 |
| tr O13054 O13054_MAKNI                            | 2921 | NYHNTWGRKKKLELQAKGGGTH PLLVPYDTLT AKEKARDREKAQE LLKFL | 2970 |
| tr A6P4B8 A6P4B8_DANRE                            | 2905 | NYHNTWGRKKKQLEAKGGGTH PLLVPYDTLT AKEKARDREKAQE LLKFL  | 2954 |
| ***** **.:****:*****:***** :****                  |      |                                                       |      |
| sp P21817 RYR1_HUMAN                              | 2931 | QMNGYAVTRG                                            | 2940 |
| tr Q29105 Q29105_PIG                              | 2932 | QMNGYAVTRG                                            | 2941 |
| sp P11716 RYR1_RABIT                              | 2931 | QMNGYAVTRG                                            | 2940 |
| tr Q80X16 Q80X16_MOUSE                            | 2932 | QMNGYAVTRG                                            | 2941 |
| tr B4XW97 B4XW97_MELGA                            | 2919 | QLNGYAVTRG                                            | 2928 |
| tr O13054 O13054_MAKNI                            | 2971 | QLNGYAVTRG                                            | 2980 |
| tr A6P4B8 A6P4B8_DANRE                            | 2955 | QLNGYAVTRG                                            | 2964 |
| *:*****                                           |      |                                                       |      |

**Supplemental Figure 1: C3 construct sequence analysis.** Sequence analysis of the RyR1 C3 construct (2733-2940) through several species indicates that this is a highly conserved region showing  $\geq 82\%$  sequence homology through all seven species with 96% homology between rabbit and human RyR1. Red indicates known phosphorylation site Ser 2843.

**Supplemental Figure 2: Docking of the RyR domain into the cryo-EM maps of RyR**

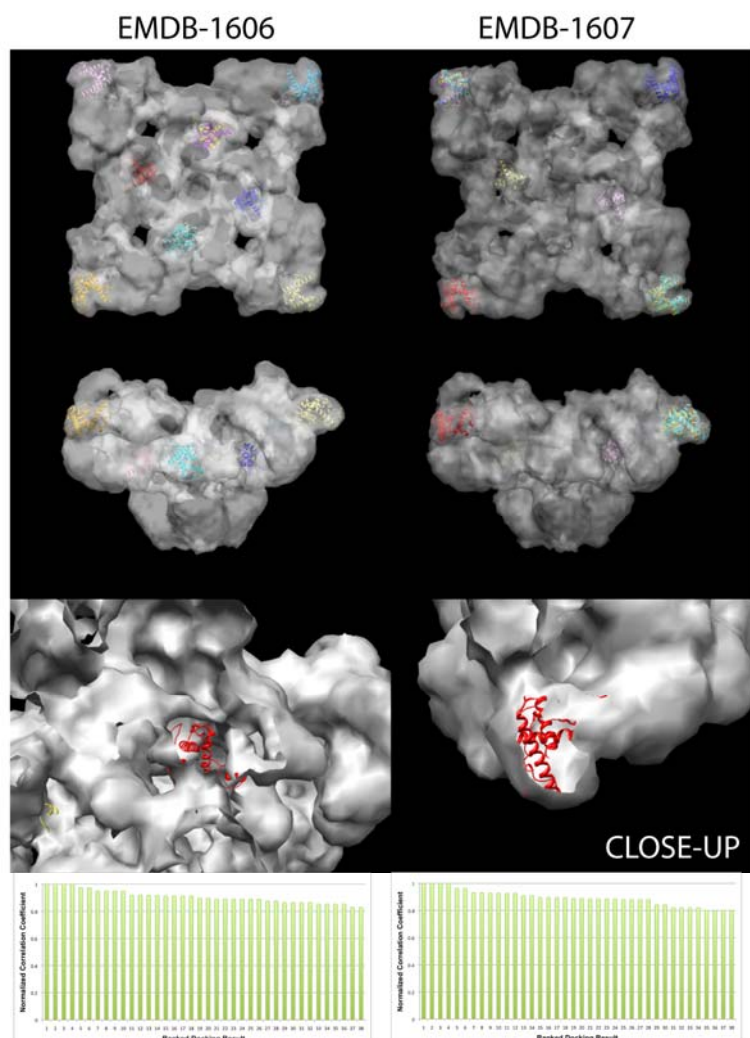

**Locations of Top 10 Solutions**

|               | EMDB-1606 | EMDB-1607 |
|---------------|-----------|-----------|
| Subregion 3:  | 1-6       | 9-10      |
| Subregion 10: | 7-10      | 1-8       |

**Supplemental Figure 2: Docking of the RyR domain into the cryo-EM maps of RyR.** Top ten docking solutions using cryo-EM maps of RyR in the open state (EMDB-1607) and the closed-state (EMDB-1606) are indicated by the RyR domain in various colours. The docked structures are shown from the top view (top panel), the side view (middle panel) and the close-up view (bottom panel). Low fitting contrast of these solutions are shown by plotting normalized correlation coefficients for the top ~40 docking solutions.

**Supplemental Figure 3: C3 construct sequence analysis between RyR1 and RyR2**

|      |      |                                          |                                                             |                      |      |  |
|------|------|------------------------------------------|-------------------------------------------------------------|----------------------|------|--|
|      |      |                                          |                                                             | $\alpha 1$           |      |  |
| RyR1 | 2733 | GNFDPRPVETLNVIIP                         | EKLDSFINKFAEYTHEKWAFDKIQNNWSYGENVDEELKTHPMLR                |                      | 2792 |  |
| RyR2 | 2700 | GNFNPQPVDTSNIIIP                         | EKLEYFINKYAEHSHDKWSMDKLANGWIYGEIYSDSSKIQLPMK                |                      | 2759 |  |
| RyR3 | 2599 | GNFDPKPIINTINFSLP                        | EKLEYIVTKYAEHSHDKWACEKSQSGWKYGISLDENVKTHPLIR                |                      | 2658 |  |
|      |      |                                          | ***:*:*:*:* * . :***** :*:*****:***: * . * ** . . . * :*::: |                      |      |  |
|      |      |                                          |                                                             | $\alpha 2$ $\beta 1$ |      |  |
| RyR1 | 2793 | PYKTFSEKDKEIYRWPIKESLKAMIAWEW            | TEKAREGEEERTEKKKTRKISQTAQTYDPR                              |                      | 2852 |  |
| RyR2 | 2760 | PYKLLSEKEKEIYRWPIKESLKTMLAWGW            | RIERTREGDSMALYNRTTRISQTSQVSVDA                              |                      | 2819 |  |
| RyR3 | 2659 | PFKTLTEKEKEIYRWPAESLKTMLAVGW             | TVERTKEGEALVQLRENEKLRVSQ--TSQG                              |                      | 2716 |  |
|      |      |                                          | *:* :*:***** :*****:* * :*::***: . . . : . : .              |                      |      |  |
|      |      |                                          |                                                             | $\alpha 3$           |      |  |
| RyR1 | 2853 | EGYNPQPPDLSGVTLSRELQAMAEQLAENYHNTWGRKKKQ | LEAKGGGTHPLLVPYDTLT                                         |                      | 2912 |  |
| RyR2 | 2820 | HGYSPPRAIDMSNVTLSDRLHAMAEMMAENYHNIWAKKKK | LELESKGGGNHPLLVPYDTLT                                       |                      | 2879 |  |
| RyR3 | 2717 | NSYNPAPLDLSNVVLSRELQGMVEVVAENYHNIWAKKKK  | LELESKGGGSHPLLVPYDTLT                                       |                      | 2776 |  |
|      |      |                                          | . . . * *:* * .*****:*:*:* :***** * .:*** ***:*****.*****   |                      |      |  |
|      |      |                                          |                                                             | $\alpha 4$ $\beta 2$ |      |  |
| RyR1 | 2913 | AKEKARDREKAQELLKFLQMG                    | YAVTRG                                                      | 2940                 |      |  |
| RyR2 | 2880 | AKEKAKDREKAQDILKFLQ                      | INGYAVSRG                                                   | 2907                 |      |  |
| RyR3 | 2777 | AKEKFRDREKAQDLFKFLQV                     | NGVIVSRG                                                    | 2804                 |      |  |
|      |      |                                          | **** :*****:***:*** * :*                                    |                      |      |  |

**Supplemental Figure 3: C3 construct sequence analysis between RyR1 and RyR2.** Amino acid sequence comparison between the RyR domain of RyR1 and the equivalent domain in RyR2 (2699-2907) showed 64% sequence homology between the two paralogs.

**Supplemental Table 1. Diffraction data collection, processing and model refinement statistics**

| <b><i>Data collection and processing</i></b>         |                            |
|------------------------------------------------------|----------------------------|
| Resolution                                           | 50-2.16 Å                  |
| $R_{\text{merge}}^a$                                 | 10.3% (84.6%) <sup>b</sup> |
| #Unique reflections                                  | 12353                      |
| Completeness                                         | 100% (100%)                |
| Mean redundancy                                      | 9.2 (8.5)                  |
| $\langle I \rangle / \langle \sigma \rangle$         | 19.7 (2.0)                 |
| <b><i>Refinement</i></b>                             |                            |
| # Protein atoms                                      | 1407                       |
| # Solvent atoms                                      | 118                        |
| $R_{\text{cryst}}^c$                                 | 21.3%                      |
| $R_{\text{free}}^d$                                  | 26.5%                      |
| Estimated coordinate error <sup>e</sup>              | 0.3 Å                      |
| <b><i>Deviations from ideal stereochemistry</i></b>  |                            |
| RMSD bonds                                           | 0.010 Å                    |
| RMSD angles                                          | 1.03°                      |
| <b><i>Ramachandran plot analysis</i><sup>h</sup></b> |                            |
| Core region                                          | 98.4%                      |
| Allowed region                                       | 1.6%                       |
| Generously allowed region                            | 0                          |
| Disallowed region                                    | 0                          |

**Supplemental Table 2: CaMKII $\beta$  peptides found in each mass spectrometry run for RyR1 C1-C3 constructs.**

|                       | Sample   | Peptide Sequence               | z | log e score  | Parent Ion Mass |
|-----------------------|----------|--------------------------------|---|--------------|-----------------|
| sp P28652 KCC2B_MOUSE | C2 run 1 | n.d                            |   |              |                 |
| sp P28652 KCC2B_MOUSE | C2 run 2 | n.d                            |   |              |                 |
| sp P28652 KCC2B_MOUSE | C2 run 3 | AGAYDFPSPEWDTVTPEAK            | 2 | -5.387216143 | 2080.95708      |
| sp P28652 KCC2B_MOUSE | C3 Run 1 | LHDSISEEGFHYLVFDLVTGGELFEDIVAR | 3 | -7.698970004 | 3407.722385     |
| sp P28652 KCC2B_MOUSE | C3 Run 1 | LHDSISEEGFHYLVFDLVTGGELFEDIVAR | 3 | -6.823908741 | 3407.708471     |
| sp P28652 KCC2B_MOUSE | C3 Run 1 | LHDSISEEGFHYLVFDLVTGGELFEDIVAR | 3 | -6.008773924 | 3407.719823     |
| sp P28652 KCC2B_MOUSE | C3 Run 1 | LHDSISEEGFHYLVFDLVTGGELFEDIVAR | 4 | -2           | 3407.718162     |
| sp P28652 KCC2B_MOUSE | C3 Run 2 | LHDSISEEGFHYLVFDLVTGGELFEDIVAR | 3 | -12.1079054  | 3407.720921     |
| sp P28652 KCC2B_MOUSE | C3 Run 2 | LHDSISEEGFHYLVFDLVTGGELFEDIVAR | 3 | -9.552841969 | 3407.725316     |
| sp P28652 KCC2B_MOUSE | C3 Run 2 | LHDSISEEGFHYLVFDLVTGGELFEDIVAR | 3 | -8.721246399 | 3407.72495      |
| sp P28652 KCC2B_MOUSE | C3 Run 2 | LHDSISEEGFHYLVFDLVTGGELFEDIVAR | 3 | -5.468521083 | 3407.7125       |
| sp P28652 KCC2B_MOUSE | C3 Run 2 | LHDSISEEGFHYLVFDLVTGGELFEDIVAR | 4 | -4.721246399 | 3407.70449      |
| sp P28652 KCC2B_MOUSE | C3 Run 2 | LHDSISEEGFHYLVFDLVTGGELFEDIVAR | 4 | -1.920818754 | 3407.719627     |
| sp P28652 KCC2B_MOUSE | C3 Run 2 | LHDSISEEGFHYLVFDLVTGGELFEDIVAR | 4 | -1.568636236 | 3407.705467     |
| sp P28652 KCC2B_MOUSE | C3 Run 2 | NLINQMILTINPAK                 | 2 | -2.244125144 | 1469.828417     |
| sp P28652 KCC2B_MOUSE | C3 Run 3 | ESSDSTNTTIEDAK                 | 2 | -2.853871964 | 1741.741259     |
| sp P28652 KCC2B_MOUSE | C3 Run 3 | LHDSISEEGFHYLVFDLVTGGELFEDIVAR | 2 | -10.22184875 | 3407.699512     |
| sp P28652 KCC2B_MOUSE | C3 Run 3 | LHDSISEEGFHYLVFDLVTGGELFEDIVAR | 3 | -7.853871964 | 3407.722019     |
| sp P28652 KCC2B_MOUSE | C3 Run 3 | LHDSISEEGFHYLVFDLVTGGELFEDIVAR | 3 | -6.292429824 | 3407.716892     |
| sp P28652 KCC2B_MOUSE | C3 Run 3 | LHDSISEEGFHYLVFDLVTGGELFEDIVAR | 4 | -2.207608311 | 3407.715965     |
| sp P28652 KCC2B_MOUSE | C3 Run 4 | LHDSISEEGFHYLVFDLVTGGELFEDIVAR | 2 | -10.34678749 | 3407.71953      |
| sp P28652 KCC2B_MOUSE | C3 Run 4 | LHDSISEEGFHYLVFDLVTGGELFEDIVAR | 3 | -10.16115091 | 3407.722754     |
| sp P28652 KCC2B_MOUSE | C3 Run 4 | LHDSISEEGFHYLVFDLVTGGELFEDIVAR | 4 | -1.387216143 | 3407.714256     |

**Supplemental Table 2: CaMKII $\beta$  peptides found in each mass spectrometry run for RyR1 C1-C3 constructs.** The constructs were immobilised on His-link beads and incubated with mouse skeletal muscle lysate to allow the formation of protein interaction complexes between the RyR1 constructs and *in vivo* binding partners. Control spectra were obtained from beads only incubated with skeletal muscle lysate. All experiments were run in triplicate (n.d – none determined). Shown are charges (z), log e scores and parent ion mass for each identified peptide.
